# Supplementary material for: Self-condensing reversible complexation-mediated copolymerization for highly branched polymers with in situ formed inimers
Source: Royal Society of Chemistry journal article supplement (doi:10.1039/c7py01560g), 2017-01-01
Supplement: c7py01560g1.pdf [file c7py01560g1.pdf]

Supporting information

## Self-condensing Reversible Complexation-mediated Copolymerization for Highly Branched Polymers with In Situ Formed Inimers

Hongjun Yang, Zhongrui Wang, Lei Cao, Wenyan Huang, Qiming Jiang, Xiaoqiang Xue, Yiye Song, and Bibiao Jiang\*

Jiangsu Key Laboratory of Environmentally Friendly Polymeric Materials, School of Materials Science and Engineering, Jiangsu Collaborative Innovation Center of Photovoltaic Science and Engineering, Changzhou University, Changzhou, Jiangsu, P. R. China 213164.

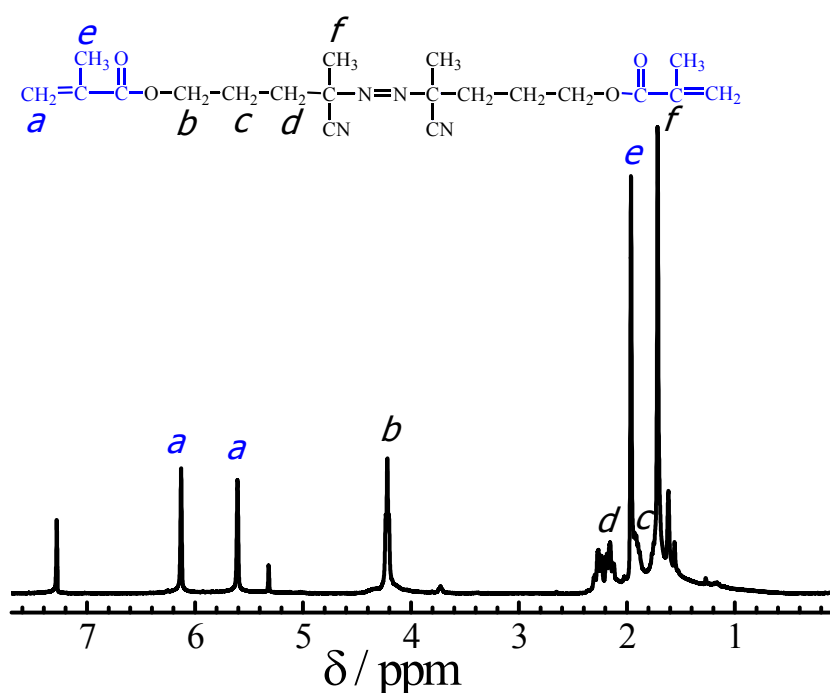

Figure S1. <sup>1</sup>H-NMR spectrum of DMACPO.

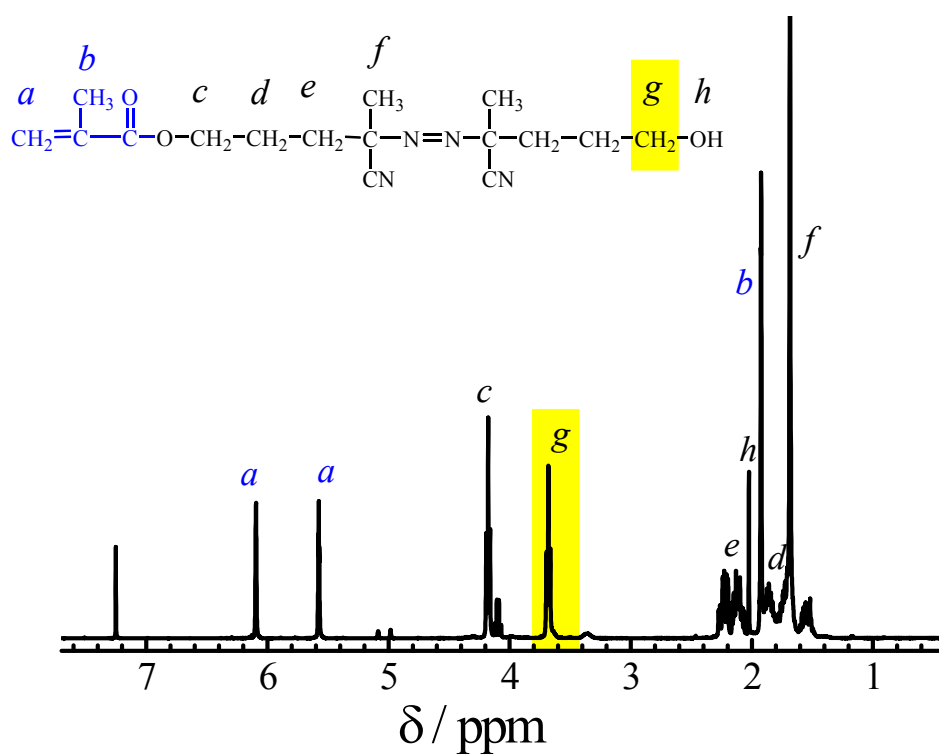

Figure S2. <sup>1</sup>H-NMR spectrum of MACPO.

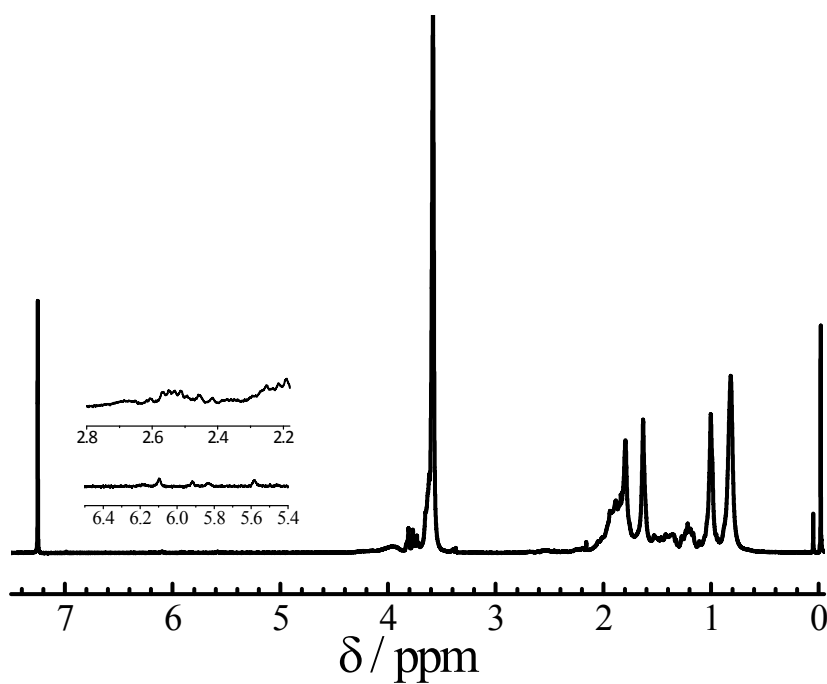

Figure S3. <sup>1</sup>H-NMR spectrum of *h*-PMMA-5. [MMA]:[DMACPO]:[V65]:[I<sub>2</sub>]:[NaI] = 40:1.6:0.5:1.0:1.0.
